# Supplementary material for: PRPF overexpression induces drug resistance through actin cytoskeleton rearrangement and epithelial-mesenchymal transition
Source: PubMed Central journal article supplement (PMC5593591; doi:10.18632/oncotarget.17855), 2017-05-15
Supplement: oncotarget-08-56659-s001.pdf [file oncotarget-08-56659-s001.pdf]

# PRPF overexpression induces drug resistance through actin cytoskeleton rearrangement and epithelial-mesenchymal transition

## SUPPLEMENTARY MATERIAL

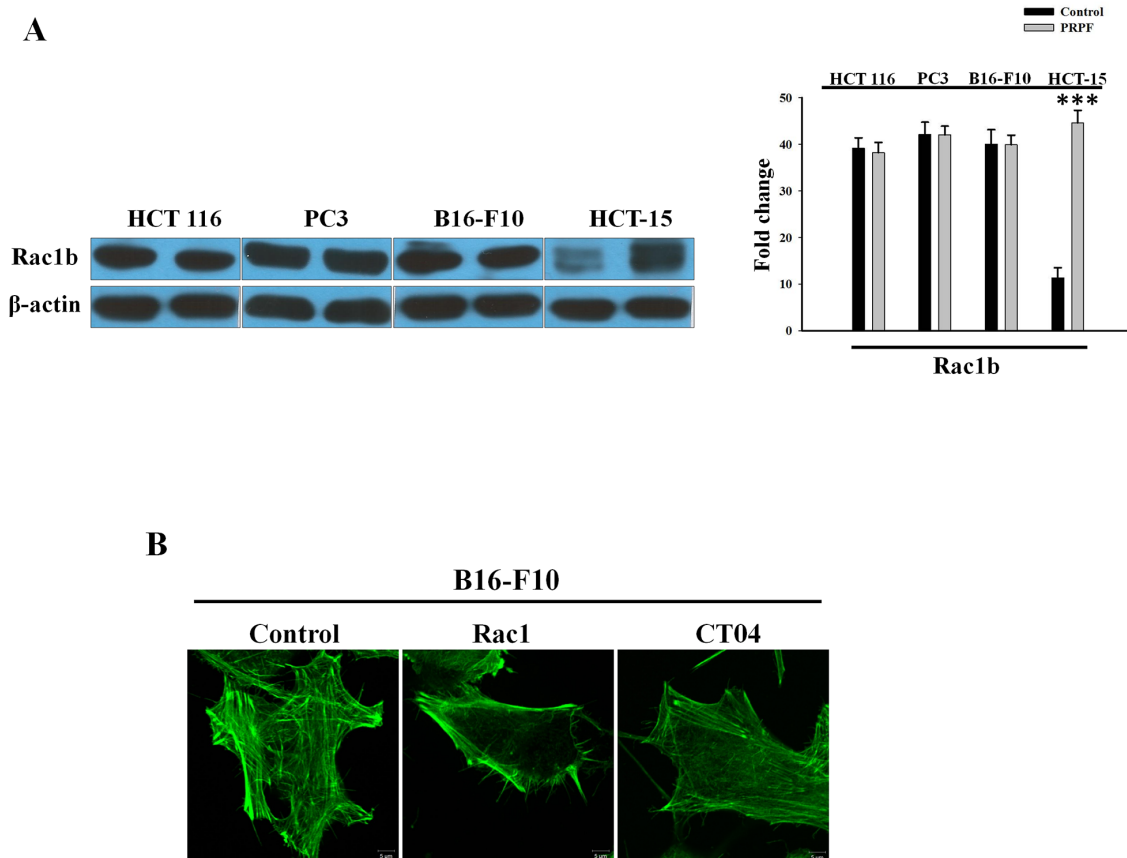

**Supplementary Figure 1: The activity of PRPF is mediated by Rho family proteins.** (A) Rac1B levels in total cell lysates from four cancer cell lines, analyzed by western blotting. Data represent the means±SD. \*\*\*P < 0.01. (B) Cytoskeletal dynamics in B16-F10 cells following Rac1 overexpression and RhoA inhibition. Cells are stained for F-actin, and analyzed by confocal microscopy at a magnification of 1000X.
